# Supplementary material for: Biomonitoring for traditional herbal medicinal products using DNA metabarcoding and single molecule, real-time sequencing
Source: PubMed Central journal article supplement — Acta Pharm Sin B. 2017 Nov 6;8(3):488–97. doi: 10.1016/j.apsb.2017.10.001 (PMC5990340; doi:10.1016/j.apsb.2017.10.001), 2017-11-06
Supplement: mmc1.pdf [file mmc1.pdf]

## Supplementary data

# Biomonitoring for traditional herbal medicinal products using DNA metabarcoding and single molecule, real-time sequencing

Tianyi Xin<sup>a</sup>, Zhichao Xu<sup>a</sup>, Jing Jia<sup>a</sup>, Christine Leon<sup>b</sup>, Songnian Hu<sup>c</sup>, Yulin Lin<sup>a</sup>, Subramanyam Ragupathy<sup>d</sup>, Jingyuan Song<sup>a,\*</sup>, Steven G. Newmaster<sup>d,\*</sup>

<sup>a</sup>*Key Lab of Chinese Medicine Resources Conservation, State Administration of Traditional Chinese Medicine of the People's Republic of China, Institute of Medicinal Plant Development, Peking Union Medical College & Chinese Academy of Medical Sciences, Beijing 100193, China*

<sup>b</sup>*Royal Botanic Gardens, Kew, Richmond, Surrey TW9 3AB, United Kingdom*

<sup>c</sup>*Beijing Institute of Genomics, Chinese Academy of Sciences, Beijing 100101, China*

<sup>d</sup>*Centre for Biodiversity Genomics, Biodiversity Institute of Ontario (BIO), University of Guelph, Guelph, Ontario N1G 2W1, Canada*

**Table S1** Proportions of the herbal materials in JWQHW.

**Table S2** PCR primers for the ITS2 and *psbA-trnH* regions.

**Table S3** Identification results of the herbal materials of JWQHW by ITS2 and *psbA-trnH* sequence.

**Table S4** The CCS results from the RS\_ReadsOfInsert.1 protocol of the SMRT portal.

**Table S5** Number of CCS reads of the prescribed herbal materials detected in five JWQHW samples with SMRT sequencing based on the ITS2 and *psbA-trnH* regions.

**Table S6** Number of CCS reads of the adulterant and contaminant species detected in five JWQHW samples with SMRT sequencing based on the ITS2 and *psbA-trnH* regions.

**Table S1** Proportions of the herbal materials in JWQHW.

| Herbal material name                     | Proportion in the preparation |
|------------------------------------------|-------------------------------|
| Notopterygii Rhizoma et Radix (Qianghuo) | 15 %                          |
| Saposhnikoviae Radix (Fangfeng)          | 15 %                          |
| Atractylodis Rhizoma (Cangzhu)           | 15 %                          |
| Asari Radix et Rhizoma (Xixin)           | 5 %                           |
| Chuanxiong Rhizoma (Chuanxiong)          | 10 %                          |
| Angelicae dahuricae Radix (Baizhi)       | 10 %                          |
| Rehmanniae Radix (Dihuang)               | 10 %                          |
| Scutellariae Radix (Huangqin)            | 10 %                          |
| Glycyrrhizae Radix et Rhizoma (Gancao)   | 10 %                          |

**Table S2** PCR primers for the ITS2 and *psbA-trnH* regions.

| Barcode          | Primer | Forward (5'-3')                     | Reverse (5'-3')                     |
|------------------|--------|-------------------------------------|-------------------------------------|
| ITS2             | ZCY01  | <u>TATAG</u> ATGCGATACTTGGTGTGAAT   | <u>TATAG</u> GACGCTTCTCCAGACTACAAT  |
|                  | ZCY02  | <u>AAGTC</u> ATGCGATACTTGGTGTGAAT   | <u>AAGTC</u> GACGCTTCTCCAGACTACAAT  |
|                  | ZCY03  | <u>CCTAG</u> ATGCGATACTTGGTGTGAAT   | <u>CCTAG</u> GACGCTTCTCCAGACTACAAT  |
|                  | ZCY04  | <u>GGAAT</u> ATGCGATACTTGGTGTGAAT   | <u>GGAAT</u> GACGCTTCTCCAGACTACAAT  |
|                  | ZCY05  | <u>ACACT</u> ATGCGATACTTGGTGTGAAT   | <u>ACACT</u> GACGCTTCTCCAGACTACAAT  |
| <i>psbA-trnH</i> | ZCY11  | <u>GTATG</u> GTTATGCATGAACGTAATGCTC | <u>GTATG</u> CGCGCATGGTGGATTACAATCC |
|                  | ZCY12  | <u>TGAAT</u> GTTATGCATGAACGTAATGCTC | <u>TGAAT</u> CGCGCATGGTGGATTACAATCC |
|                  | ZCY13  | <u>TAATC</u> GTTATGCATGAACGTAATGCTC | CGCGCATGGTGGATTACAATCC              |
|                  | ZCY14  | <u>AAGTC</u> GTTATGCATGAACGTAATGCTC | <u>AAGTC</u> CGCGCATGGTGGATTACAATCC |
|                  | ZCY15  | <u>GCGTA</u> GTTATGCATGAACGTAATGCTC | <u>GCGTA</u> CGCGCATGGTGGATTACAATCC |

“    ” showed the 5 bp tag.

**Table S3** Identification results of the herbal ingredients of JWQHW by ITS2 and *psbA-trnH* sequence.

| Name                                     | ITS2 | <i>psbA-trnH</i> |
|------------------------------------------|------|------------------|
| Notopterygii Rhizoma et Radix (Qianghuo) | √    | √                |
| Saposhnikoviae Radix (Fangfeng)          | √    | —                |
| Atractylodis Rhizoma (Cangzhu)           | —    | —                |
| Asari Radix et Rhizoma (Xixin)           | √    | —                |
| Chuanxiong Rhizoma (Chuanxiong)          | √    | —                |
| Angelicae Dahuricae Radix (Baizhi)       | —    | —                |
| Scutellariae Radix (Huangqin)            | √    | —                |
| Rehmanniae Radix (Dihuang)               | √    | —                |
| Glycyrrhizae Radix et Rhizoma (Gancao)   | √    | √                |

**Table S4** The CCS results from the RS\_ReadsOfInsert.1 protocol of the SMRT portal.

| Job metric                  | Value        |
|-----------------------------|--------------|
| Read bases of insert        | 4,554,944 bp |
| Mean read length of insert  | 422.0 bp     |
| Mean read quality of insert | 99.8%        |
| Mean number of passes       | 59.0         |

**Table S5** Number of CCS reads of the prescribed herbal materials detected in five JWQHW samples with SMRT sequencing based on the ITS2 and *psbA-trnH* regions.

| Name                                     | JWQHW01 |                  | JWQHW02 |                  | JWQHW03 |                  | RF01 |                  | RF02 |                  |
|------------------------------------------|---------|------------------|---------|------------------|---------|------------------|------|------------------|------|------------------|
|                                          | ITS2    | <i>psbA-trnH</i> | ITS2    | <i>psbA-trnH</i> | ITS2    | <i>psbA-trnH</i> | ITS2 | <i>psbA-trnH</i> | ITS2 | <i>psbA-trnH</i> |
| Notopterygii Rhizoma et Radix (Qianghuo) | 112     | 3                | 491     |                  | 444     | 12               | 32   | 19               | 31   | 18               |
| Saposhnikoviae Radix (Fangfeng)          |         | 1                | 14      |                  | 200     |                  | 107  |                  | 122  |                  |
| Atractylodis Rhizoma (Cangzhu)           | 1       | 6                | 10      |                  | 8       | 1                |      |                  |      |                  |
| Asari Radix et Rhizoma (Xixin)           | 165     |                  | 71      |                  | 187     |                  | 21   |                  | 45   |                  |
| Chuanxiong Rhizoma (Chuanxiong)          | 27      | 288              | 42      | 5                | 5       | 1                | 523  | 1436             | 568  | 1193             |
| Scutellariae Radix (Huangqin)            |         | 3                |         |                  |         | 1                |      | 68               |      | 68               |
| Rehmanniae Radix (Dihuang)               |         |                  |         |                  |         |                  | 2    |                  | 3    |                  |
| Glycyrrhizae Radix et Rhizoma (Gancao)   | 215     | 29               | 209     | 2                | 190     | 9                | 326  | 230              | 342  | 242              |
| Angelicae Dahuricae Radix (Baizhi)       |         |                  |         |                  |         |                  |      |                  |      |                  |
| <i>Panax ginseng</i>                     |         |                  |         |                  |         |                  |      |                  |      | 9                |

**Table S6** Number of CCS reads of the adulterant and contaminant species detected in five JWQHW samples with SMRT sequencing based on the ITS2 and *psbA-trnH* regions.

| No. | Family         | Genus               | JWQHW01 |                  | JWQHW02 |                  | JWQHW03 |                  | RF01 |                  | RF02 |                  |
|-----|----------------|---------------------|---------|------------------|---------|------------------|---------|------------------|------|------------------|------|------------------|
|     |                |                     | ITS2    | <i>psbA-trnH</i> | ITS2    | <i>psbA-trnH</i> | ITS2    | <i>psbA-trnH</i> | ITS2 | <i>psbA-trnH</i> | ITS2 | <i>psbA-trnH</i> |
| 1   | Aceraceae      | <i>Acer</i>         | 3       |                  |         |                  |         |                  |      |                  |      |                  |
| 2   | Actinidiaceae  | <i>Actinidia</i>    | 2       |                  |         |                  |         |                  |      |                  |      |                  |
| 3   | Alismataceae   | <i>Alisma</i>       |         |                  |         |                  | 1       |                  |      |                  |      |                  |
| 4   | Amaranthaceae  | <i>Amaranthus</i>   | 1       |                  |         |                  |         |                  |      |                  |      |                  |
| 5   | Asteraceae     | <i>Artemisia</i>    | 1       |                  |         |                  | 1       |                  |      |                  |      |                  |
| 6   |                | <i>Atractylodes</i> | 27      |                  | 1       |                  |         |                  |      |                  |      |                  |
| 7   |                | <i>Cirsium</i>      |         |                  |         |                  | 1       |                  |      |                  |      |                  |
| 8   |                | <i>Saussurea</i>    |         |                  | 1       |                  |         |                  |      |                  |      |                  |
| 9   |                | <i>Taraxacum</i>    |         |                  |         |                  | 1       |                  |      |                  |      |                  |
| 10  | Caprifoliaceae | <i>Sambucus</i>     |         |                  | 1       |                  |         |                  |      |                  |      |                  |
| 11  | Chenopodiaceae | <i>Chenopodium</i>  |         | 1                |         |                  | 2       |                  |      |                  |      |                  |
| 12  | Convolvulaceae | <i>Convolvulus</i>  | 3       |                  | 1       |                  |         |                  |      |                  |      |                  |

|    |               |                      |     |    |     |  |    |     |           |
|----|---------------|----------------------|-----|----|-----|--|----|-----|-----------|
| 13 |               | <i>Cuscuta</i>       | 2   |    |     |  |    |     |           |
| 14 |               | <i>Ipomoea</i>       | 4   |    | 5   |  | 3  |     |           |
| 15 | Cruciferae    | <i>Isatis</i>        | 1   |    |     |  |    |     |           |
| 16 | Cucurbitaceae | <i>Citrullus</i>     |     |    |     |  |    | 4   |           |
| 17 |               | <i>Trichosanthes</i> |     |    |     |  |    | 1   |           |
| 18 | Elaeagnaceae  | <i>Hippophae</i>     |     |    | 2   |  | 1  |     |           |
| 19 | Ericaceae     | <i>Rhododendron</i>  | 1   |    | 16  |  | 13 |     |           |
| 20 | Fabaceae      | <i>Alhagi</i>        |     |    | 1   |  |    |     |           |
| 21 |               | <i>Cullen</i>        | 1   |    |     |  |    |     |           |
| 22 |               | <i>Hedysarum</i>     |     |    | 1   |  |    | 1   |           |
| 23 |               | <i>Lablab</i>        |     |    | 4   |  |    |     |           |
| 24 |               | <i>Phaseolus</i>     |     |    | 1   |  |    |     |           |
| 25 |               | <i>Vicia</i>         | 4   |    | 3   |  | 1  |     |           |
| 26 |               | <i>Vigna</i>         |     |    |     |  |    | 1   |           |
| 27 | Geraniaceae   | <i>Erodium</i>       | 1   | 1  |     |  |    |     |           |
| 28 |               | <i>Geranium</i>      |     | 1  | 1   |  | 1  |     |           |
| 29 | Gramineae     | <i>Digitaria</i>     |     |    |     |  | 1  |     |           |
| 30 | Juglandaceae  | <i>Juglans</i>       |     | 1  |     |  |    | 1   |           |
| 31 | Lamiaceae     | <i>Isodon</i>        |     |    |     |  | 1  |     |           |
| 32 |               | <i>Perilla</i>       |     |    | 1   |  |    |     |           |
| 33 |               | <i>Pogostemon</i>    |     |    | 2   |  | 1  | 10  |           |
| 34 | Loranthaceae  | <i>Scurrula</i>      |     | 16 |     |  |    | 1   |           |
| 35 |               | <i>Taxillus</i>      |     | 28 |     |  |    |     |           |
| 36 | Oleaceae      | <i>Fraxinus</i>      |     |    | 1   |  |    |     |           |
| 37 | Paeoniaceae   | <i>Paeonia</i>       | 120 | 34 | 5   |  | 6  | 1   |           |
| 38 | Pinaceae      | <i>Picea</i>         |     |    | 1   |  |    |     |           |
| 39 | Polygonaceae  | <i>Rumex</i>         |     |    |     |  |    | 57  |           |
| 40 | Rhamnaceae    | <i>Ziziphus</i>      |     | 2  |     |  |    |     |           |
| 41 | Rosaceae      | <i>Prunus</i>        |     |    | 1   |  |    |     |           |
| 42 |               | <i>Rosea</i>         |     |    |     |  | 1  |     |           |
| 43 |               | <i>Rubus</i>         | 1   |    | 2   |  |    |     |           |
| 44 |               | <i>Sanguisorba</i>   | 1   |    |     |  |    | 3   | 1 2       |
| 45 |               | <i>Spiraea</i>       | 1   |    |     |  |    |     |           |
| 46 | Rutaceae      | <i>Zanthoxylum</i>   |     |    | 1   |  |    |     |           |
| 47 | Salicaceae    | <i>Salix</i>         |     | 1  | 2   |  |    | 2   |           |
| 48 | Tiliaceae     | <i>Tilia</i>         | 1   |    |     |  |    |     |           |
| 49 | Umbelliferae  | <i>Angelica</i>      |     | 7  | 287 |  | 89 | 256 | 126 1 118 |
| 50 |               | <i>Bupleurum</i>     | 1   |    | 4   |  | 2  |     |           |
| 51 |               | <i>Foeniculum</i>    | 3   |    |     |  |    |     |           |
| 52 |               | <i>Heracleum</i>     |     |    | 3   |  | 1  |     |           |
| 53 |               | <i>Ligusticum</i>    | 1   |    |     |  | 39 | 1   |           |
| 54 |               | <i>Peucedanum</i>    | 192 | 12 | 2   |  | 6  |     | 1         |
| 55 |               | <i>Pimpinella</i>    |     | 3  |     |  | 2  | 1   | 1 2       |
| 56 |               | <i>Pleurospermum</i> |     |    |     |  | 2  |     |           |
| 57 | Verbenaceae   | <i>Tectona</i>       |     |    |     |  |    |     | 3         |
